# Supplementary material for: Smoc1 and Smoc2 regulate bone formation as downstream molecules of Runx2
Source: PubMed Central journal article supplement (PMC8526618; doi:10.1038/s42003-021-02717-7), 2021-10-19
Supplement: 42003_2021_2717_MOESM3_ESM.pdf [file 42003_2021_2717_MOESM3_ESM.pdf]

## Description of Additional Supplementary Files

**File name:** Supplementary Data 1

**Description:** (Smoc1(+/-); Smoc2(+/-) x Smoc1(+/-); Smoc2(+/-) E18.5 stage).

**File name:** Supplementary Data 2

**Description:** Differential gene expression in limb bud cells. Bmp2 vs Venus control

**File name:** Supplementary Data 3

**Description:** Differential gene expression in limb bud cells. Runx2 vs Venus control.

**File name:** Supplementary Data 4

**Description:** Source data for main figures.
